# Supplementary material for: Shotgun metagenomic sequencing reveals the influence of artisanal dairy environments on the microbiomes, quality, and safety of Idiazabal, a raw ewe milk PDO cheese
Source: PubMed Central journal article supplement (PMC11662609; doi:10.1186/s40168-024-01980-0), 2024-12-20
Supplement: 40168_2024_1980_MOESM1_ESM.pdf [file 40168_2024_1980_MOESM1_ESM.pdf]

## Supplementary results

### 1-Taxonomic analysis of samples

Regarding the microbiota of each sample, the raw milk was composed of 388 bacterial genera 452 species, within which, 6 genera were above 1%, namely, *Escherichia*, *Enterococcus*, *Lactococcus*, *Pseudomonas\_E*, *Staphylococcus* and *Pantoea*. Moreover, the most important species were *Escherichia coli\_D*, *Escherichia flexneri*, *Enterococcus faecalis*, *Lactococcus lactis\_E*, *Staphylococcus epidermidis*, *Pseudomonas\_E sp002966775* and *Pantoea agglomerans*. Along the cheese making process, the microbiota of the generated whey was composed of 71 genera and 84 species, predominating *Lactococcus*, *Staphylococcus\_A*, *Lactobacillus\_C*, *Pseudomonas\_E*, *Leuconostoc*, CAG-196 and *Brevibacillus\_B*, being the most important species within this genera *Lactococcus lactis\_E*, *Lactococcus lactis*, *Staphylococcus\_A fleurettii*, *Pseudomonas\_E weihenstephanensis*, CAG-196 *sp002102975*, *Brevibacillus\_B laterosporus\_D*, *Leuconostoc mesenteroides*, *Leuconostoc pseudomesenteroides* and *Lactobacillus\_H fermentum*. In the case of cheese, 52 genera and 87 species were identified, being the main bacterial genera *Lactococcus*, *Lactobacillus\_C*, *Staphylococcus\_A*, *Pseudomonas\_E*, *Leuconostoc* and CAG-196 and specifically, the species *Lactococcus lactis*, *Lactococcus lactis\_E*, *Lactobacillus\_C paracasei*, *Staphylococcus\_A fleurettii*, *Pseudomonas\_E weihenstephanensis* and CAG-196 *sp002102975*. In general, throughout cheese-making, the majority of predominant bacteria reduced their abundance, except *Lactococcus* in cheese and whey, and *Pseudomonas* in whey. Nevertheless, even reducing their abundance they did not disappear. Likewise, other minority genera (< 0.01%) present in raw milk, such as *Streptococcus*, *Staphylococcus\_A* or *Leuconostoc*, gained importance in whey and cheese. Other genera such as *Lactobacillus\_C*, *Brevibacillus\_B*, UBA6398, CAG-196 and species such as *Lactobacillus\_C paracasei*; CAG-196 *sp002102975*, *Staphylococcus\_A fleurettii*, *Pseudomonas\_E weihenstephanensis* or *Streptococcus thermophilus* that were not present in raw milk also predominated in whey and cheese (> 1%), which would indicate other potential microbial sources.

In order to identify the microbial sources within artisanal dairies that contribute to the microbiota of milk and also, whey and cheese, different samples were taken in the artisanal dairies. Regarding herd

management and feeding, in the commercial feed 204 bacterial genera and 283 species were identified, predominating *Lactococcus*, *Bradyrhizobium*, *Pantoea*, *Acinetobacter*, *Vibrio*, *Serratia*, *Pseudomonas\_E*, *Faecalibacterium*, *UBA2912*, *Erwinia*, *Prevotella*, *Paenibacillus\_S*, *Streptococcus*, *Bacteroides*, *Bacteroides\_B*, *Chromohalobacter* and *Lachnospira*; and the species *Lactococcus lactis*, *Lactococcus lactis\_E*, *Bradyrhizobium* sp003020115, *Pantoea agglomerans*, *Acinetobacter venetianus*, *Serratia ureilytica*, and *Prevotella copri*. Other representative species of the dominant genera were *Vibrio furnissii*, *UBA2912* sp900317095, *Erwinia persicina*, *Streptococcus thermophilus*, *Bacteroides\_B vulgatus*, *Bacteroides uniformis*, *Faecalibacterium prausnitzii\_D*, *Pseudomonas\_A stutzeri*, *Chromohalobacter japonicas*, *Lachnospira eligens\_B* and *Paenibacillus\_J* sp001721045. In the case of straw, 413 genera and 674 species were identified, although 5 genera predominated, namely, *Sphingomonas*, *Methylobacterium*, *Pseudomonas\_E*, *Curtobacterium* and *Frigoribacterium*, being the most important species within predominating genera *Sphingomonas aerolata*, *Curtobacterium* sp003234355, *Frigoribacterium* sp001423665, *Methylobacterium* sp000376345 and *Pseudomonas\_E orientalis\_A*. In the collected grass, 555 genera and 1030 species were identified, predominating 7 genera, *Pseudomonas\_E*, *Pantoea*, *Psychrobacter*, *Siccibacter*, *Erwinia*, *Kosakonia* and *Stenotrophomonas*, and the species *Pantoea agglomerans*, *Pseudomonas\_E poae*, *Siccibacter colletis*, *Kosakonia cowanii*, *Pseudomonas\_E viridiflava*, *Pseudomonas\_E monteilii\_A*, *Psychrobacter* sp002352555 and *Pseudomonas\_E* sp002979555. The representative species of the rest of predominating genera were *Erwinia\_B gerundensis* and *Stenotrophomonas indicatrix*. Finally, in the home-made feed, 293 genera and 440 species were identified, being the dominant taxa *Pantoea*, *Pseudomonas\_E*, *Glutamicibacter*, *Erwinia* and *Acinetobacter*, and predominating *Pantoea agglomerans*, *Glutamicibacter* sp001512275 and *Erwinia* sp002752575. The representative species of the rest of predominating genera were *Acinetobacter johnsonii* and *Pseudomonas\_E coleopterorum*.

According to the microbiota of the teat skin, 645 genera and 792 species were identified, with 6 bacterial genera predominating (> 1%), namely *Jeotgalicoccus*, *Psychrobacter*, *CAG-791*, *Methanobrevibacter\_A*, *Staphylococcus* and *Bifidobacterium*; and being *Lactococcus lactis*, *Lactococcus lactis\_E*, *Lactobacillus\_C paracasei*, and *Brevibacillus\_B laterosporus\_D* the predominant species, and *Staphylococcus\_A fleurettii*,

*Psychrobacter alimentarius*, *Jeotgalicoccus* sp003513765 and *Bifidobacterium pseudolongum\_A* the most notable species within the aforementioned genera. It should be noted that no species were identified for *Methanobrevibacter\_A* genera, despite its' predominance.

In the food contact surfaces of the dairy, 336 genera and 500 species were identified. The predominant genera were *Brevibacterium*, *Staphylococcus*, *Brachybacterium*, *Pseudomonas\_E*, *Psychrobacter*, *Halomonas*, *Chromohalobacter*, *Marinilactibacillus*, *Dietzia*, *Corynebacterium*, *Streptomyces*, *Micrococcus* and *Acinetobacter*. *Brevibacterium aurantiacum*, *Brevibacterium sandarakinum*, *Staphylococcus equorum\_B*, *Brachybacterium xerosis*, *Brachybacterium alimentarium*, *Brevibacterium antiquum*, *Brevibacterium* sp900169365, *Psychrobacter* sp001652315, *Brachybacterium* sp002407185, *Halomonas subglaciescola*, *Pseudomonas\_E fluorescens\_N*, *Pseudomonas\_E* sp002966775, *Marinilactibacillus psychrotolerans*, *Psychrobacter* sp002810365, *Brachybacterium* sp002216795 and *Chromohalobacter japonicas*. The most representative species of the rest of predominating genera were *Dietzia* sp002441635, *Corynebacterium glyciniphilum*, *Streptomyces albidoflavus*, *Micrococcus* sp000224415 and *Acinetobacter albensis*. In the case of non-food contact surfaces, 328 genera and 815 species were identified, with 11 genera dominating, namely *Pseudomonas\_E*, *Staphylococcus*, *Brevibacterium*, *Psychrobacter*, *Brachybacterium*, *Halomonas*, *Corynebacterium*, *Shewanella*, *Stenotrophomonas*, *Marinilactibacillus* and *Salinicoccus*. At species level, dominated *Staphylococcus equorum\_B*, *Brevibacterium aurantiacum*, *Psychrobacter* sp001652315, *Pseudomonas\_E salomonii*, *Brevibacterium sandarakinum*, *Pseudomonas\_E* sp002843585, *Pseudomonas\_E* sp002742565, *Brevibacterium* sp900169365, *Shewanella* sp002966515, *Brachybacterium alimentarium*, *Brevibacterium antiquum*, *Pseudomonas\_E fluorescens\_N*, *Marinilactibacillus psychrotolerans*, *Staphylococcus equorum\_A*, *Pseudomonas\_E synxantha* and *Pseudomonas\_E* sp002966775. The most representative species of the rest of predominating genera were *Halomonas subglaciescola*, *Corynebacterium glyciniphilum*, *Stenotrophomonas* sp003484865 and *Salinicoccus halodurans*.

In the artisanal rennet, 484 bacterial genera and 850 species were identified, within which, 13 bacterial genera were dominant (> 1%), namely, *Lactobacillus\_H*, *Lactobacillus*, *Lactobacillus\_G*, *Prevotella*, *Streptococcus*, *F082*, *Bacteroides*, *RC9*, *Bact-11*, *UBA1711*, *Pseudomonas\_E*, *CAG-791* and

*Methanobrevibacter\_A*. The dominant species were *Lactobacillus\_H reuteri*, *Lactobacillus amylovorus*, *Lactobacillus\_G buchneri* and *F082 sp001543395*. The most representative species of the rest of predominating genera were *Prevotella sp002393725*, *Streptococcus pasteurianus*, *Bacteroides pyogenes*, *RC9 sp900319685*, *Bact-11 sp002361615*, *UBA1711 sp002354035*, *Pseudomonas\_E fragi\_B*, *CAG-791 sp002394525* and *Methanobrevibacter\_A sp900314615*.

Finally, the brine used for cheese-making contained 273 bacterial genera and 432 species, within which, *Chromohalobacter*, *Brevibacterium*, *Lactococcus*, *Brachybacterium*, *Halomonas*, *Staphylococcus*, *Acinetobacter*, *Pseudomonas\_E*, *Stenotrophomonas*, *Psychrobacter* and *Marinilactibacillus* dominated, and the species *Chromohalobacter japonicus*, *Chromohalobacter canadensis*, *Chromohalobacter salexigens*, *Brevibacterium sandarakinum*, *Lactococcus lactis*, *Brevibacterium aurantiacum*, *Lactococcus lactis\_E*, *Staphylococcus equorum\_B*, *Acinetobacter johnsonii*, *Brachybacterium alimentarium*, and *Brachybacterium sp002407185*. The most representative species of the rest of predominating genera were *Halomonas shengliensis*, *Pseudomonas\_E azotoformans\_A*, *Stenotrophomonas lactitubi* and *Marinilactibacillus psychrotolerans*. Overall, as shown in Figure XB, it was confirmed that predominant bacteria of raw milk, whey and cheese were also present in the environmental samples of artisanal dairies.
